# Supplementary material for: Systematic reviews are rarely used to contextualise new results—a systematic review and meta-analysis of meta-research studies
Source: Syst Rev. 2022 Sep 5;11:189. doi: 10.1186/s13643-022-02062-8 (PMC9446778; doi:10.1186/s13643-022-02062-8)
Supplement: Supplementary file 5 — Additional file 5. Results of data extraction. [file 13643_2022_2062_MOESM5_ESM.xlsx]

## Sheet: Ark1
	Study type included	Year of inclusion	Included studies	N updating a SR	N cited SR	N in context of SR	Type of contextualizing
Clarke et al. 2002	RCT	2001	33	0	3	3	cite
Clarke et al. 1998	RCT	1997	26	0	6	6	cite
Clarke et al. 2013	RCT	2012	35	2	11	13	update
Clarke et al. 2007	RCT	2005	18	0	5	5	cite
Clarke et al. 2010	RCT	2009	29	1	10	11	update
Engelking et al. 2018	RCT	2014 2015 2016	622		245	245	cite
Goudie et al. 2010	RCT	2007	27	1	10	11	cite
Helfer et al. 2015	MA, SR	2013	52		25	25	update
Hoderlein et al. 2017 - 1	RCT	2001	70	0	12	12	cite
Hoderlein et al. 2017 - 2	RCT	2015	151	1	52	53	update
Rauh et al. 2020	RCT	2014-2017	458		207	207	cite
Rosenthal et al. 2017	RCT	2010	51	0	9	9	cite
Torgeson et al. 2020	RCT	2018	152		35	35	cite
Three meta-research studies (Johnson et al 2020, Shepard et al. 2021, Walters et al. 2020) presents no quantitative data operable for the meta-analysis and are not included in the meta-analysis.
